# Supplementary material
Source: publisher site journal article supplement (https://thieme-connect.com/media/10.1055-s-00035037/201602/supmat/10-3414-me15-01-0004-supp.pdf)
Supplement: Supplementary file 1 [file 10-3414-me15-01-0004-supp.pdf]

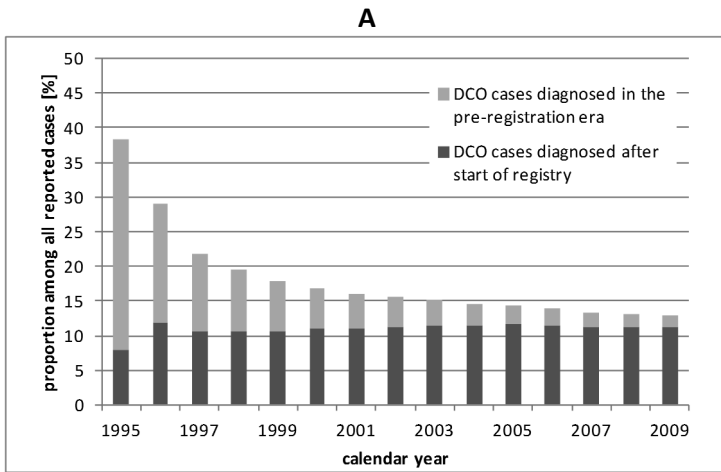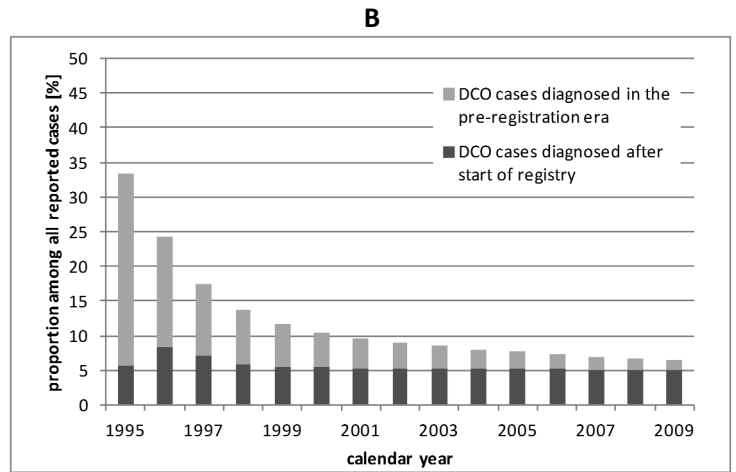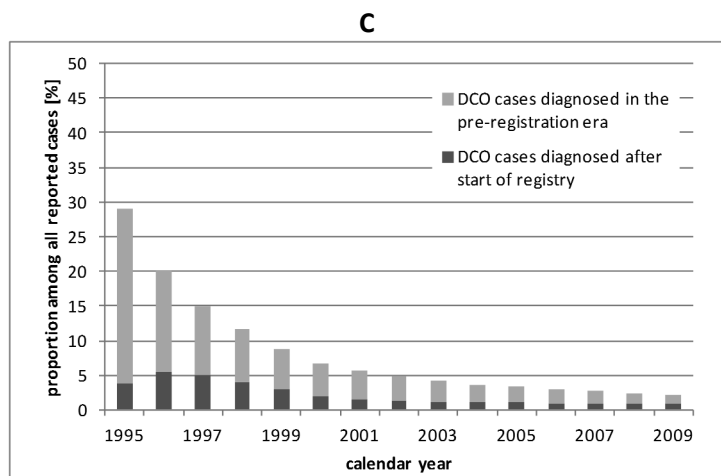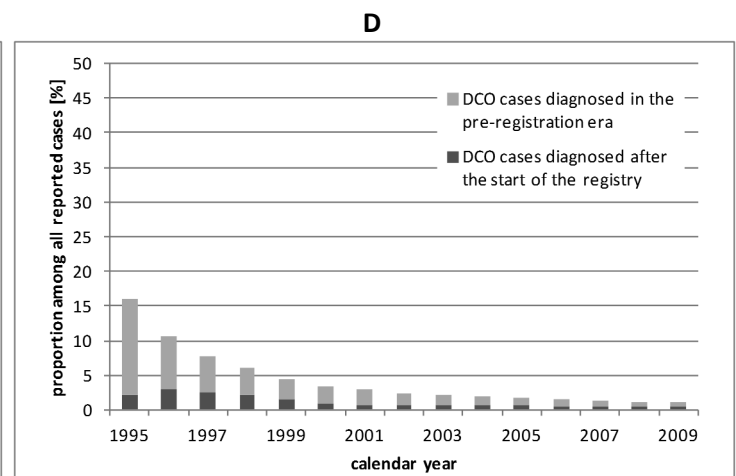

**Supplementary Figure 1** Proportions of modelled death certificate only (DCO) notified cases by calendar year according to the period of diagnosis for scenarios 1-4 (subfigures A-D) in a newly established cancer registry between 1995 and 2009
